# Crustose Coralline Algae and a Cnidarian Neuropeptide Trigger Larval Settlement in Two Coral Reef Sponges

Steve Whalan<sup>1\*</sup>, Nicole S. Webster<sup>2</sup>, Andrew P. Negri<sup>2</sup>

**1** School of Marine and Tropical Biology, James Cook University, Townsville, Queensland, Australia, **2** Australian Institute of Marine Science, Townsville, Queensland, Australia

## Abstract

In sessile marine invertebrates, larval settlement is fundamental to population maintenance and persistence. Cues contributing to the settlement choices and metamorphosis of larvae have important implications for the success of individuals and populations, but cues mediating larval settlement for many marine invertebrates are largely unknown. This study assessed larval settlement in two common Great Barrier Reef sponges, *Coscinoderma matthewsi* and *Rhopaloeides odorabile*, to cues that enhance settlement and metamorphosis in various species of scleractinian coral larvae. Methanol extracts of the crustose coralline algae (CCA), *Porolithon onkodes*, corresponding to a range of concentrations, were used to determine the settlement responses of sponge larvae. Cnidarian neuropeptides (GLW-amide neuropeptides) were also tested as a settlement cue. Settlement in both sponge species was approximately two-fold higher in response to live chips of CCA and optimum concentrations of CCA extract compared to 0.2  $\mu\text{m}$  filtered sea water controls. Metamorphosis also increased when larvae were exposed to GLW-amide neuropeptides; *R. odorabile* mean metamorphosis reached  $42.0 \pm 5.8\%$  compared to  $16.0 \pm 2.4\%$  in seawater controls and in *C. matthewsi* mean metamorphosis reached  $68.3 \pm 5.4\%$  compared to  $36.7 \pm 3.3\%$  in seawater controls. These results demonstrate the contributing role chemosensory communication plays in the ability of sponge larvae to identify suitable habitat for successful recruitment. It also raises the possibility that larvae from distinct phyla may share signal transduction pathways involved in metamorphosis.

**Citation:** Whalan S, Webster NS, Negri AP (2012) Crustose Coralline Algae and a Cnidarian Neuropeptide Trigger Larval Settlement in Two Coral Reef Sponges. PLoS ONE 7(1): e30386. doi:10.1371/journal.pone.0030386

**Editor:** Sebastian C. A. Ferse, Leibniz Center for Tropical Marine Ecology, Germany

**Received:** September 13, 2011; **Accepted:** December 15, 2011; **Published:** January 25, 2012

**Copyright:** © 2012 Whalan et al. This is an open-access article distributed under the terms of the Creative Commons Attribution License, which permits unrestricted use, distribution, and reproduction in any medium, provided the original author and source are credited.

**Funding:** This work was funded through an Australian Research Council linkage grant with Reef HQ to SW (LP990664). The funders had no role in study design, data collection and analysis, decision to publish, or preparation of the manuscript.

**Competing Interests:** The authors have declared that no competing interests exist.

\* E-mail: stephen.whalan@scu.edu.au

† Current address: School of Environmental Science and Management, Southern Cross University, Lismore, Australia

## Introduction

Larval settlement is intricately linked to population maintenance and persistence, so understanding the processes that influence settlement and recruitment is fundamental to the management and conservation of marine ecosystems. This is particularly true for sessile marine invertebrates where a mobile larval phase is largely responsible for distribution patterns, and with key larval settlement behaviours being a first step to recruitment success. Research on the settlement of sessile invertebrate larvae to coral reefs has understandably focused on corals, which often dominate these habitats [1–5]. Nevertheless, there is a limited knowledge of the specific cues that contribute to settlement of corals and this is even more uncertain for other sessile invertebrates such as sponges [6]. It is clear that the processes contributing to larval settlement are complex with apparent physical and chemical substrate specificities inducing settlement in some taxa [5] while for others settlement specificity appears less important [7].

Physical cues that contribute to settlement include complexity of surface micro-topography [8,9] and orientation of settlement surface and incidence of light [10,11]. Chemical cues are also implicated in larval settlement [12]. Microbial biofilms are common inducers for sessile invertebrates [13–15] with the age and composition of biofilms being influential in larval settlement

[16]. Other chemical cues associated with conspecifics [17] and host symbionts [18] also contribute to larval settlement. Importantly, larval settlement is often linked to a hierarchy of cues associated with habitats that optimise settlement and therefore recruitment to populations [6,11].

A number of crustose coralline algal (CCA) species can induce settlement in various species of coral [10,19–21]. Moreover, extracts of CCA with ethanol (or methanol) have induced settlement in some coral species [19] with gene expression profiles during early metamorphosis being similar in coral larvae exposed to either live CCA or CCA extracts [22]. Although apparently common, this induction of coral larval metamorphosis by CCA is not universal, as the larvae of some coral species are not induced by the presence of CCA [21]. Nevertheless, the very clear settlement induction of key groups of corals to CCA, coupled with the ubiquitous presence of these algae on coral reefs, raises questions as to the importance of this habitat cue for other sessile coral reef invertebrates, such as sponges.

The identification of settlement cues associated with habitats suggests marine larvae have the ability to recognise specific compounds that either identify favourable habitats or initiate metamorphosis [15,23]. For cnidarians with fundamental neural pathways, exposure to neuropeptides has been shown to initiate metamorphosis (and sometimes settlement) for different classes within this phylum [24]. A family of neuropeptides known as

GLW-amides has been linked to signalling and internal coordination of metamorphosis in some cnidarians often following exposure to external environmental cues [25,26]. Within the Scleractinia, synthetic analogues of the neuropeptide GLW-amide induces metamorphosis in the larvae of some Acroporid corals, but to date has not elicited responses in other coral genera tested [27].

Neuro-transmission signalling compounds and their role in larval metamorphosis appear conserved across classes of cnidarians [27], and it is also plausible that similar systems may operate in the closely related Porifera. Despite the notion that sponges exhibit no distinct neural capacity, recent work detailing the genome of the sponge, *Amphimedon queenslandica*, suggests sponges have the building blocks of neural genes [28]. Of interest, is that while some key genes related to synaptic function are missing in *A. queenslandica*, other genes found in metazoan sensory systems are embedded in the *A. queenslandica* genome [28]. Questions surrounding the complexity of these genes and how they might contribute to stimulating or initiating metamorphosis, as seen in the larvae of coral species, are as yet unexplored.

This study aimed to investigate whether cues commonly implicated in the settlement and metamorphosis of coral larvae also influences larval settlement for coral reef sponges. We specifically tested the settlement of two common species of Great Barrier Reef (GBR) sponges, *Coscinoderma matthewsi* and *Rhopaloeides odorabile*, to the CCA *Porolithon onkodes*. This included both live algae and a range of concentrations of algal extracts. We also tested the potential morphogenic activity of a synthetic analogue of GLW-amide, a cnidarian neuropeptide, which can induce metamorphosis in several Acroporid coral species [27]. We found that larval settlement was enhanced in response to both CCA and GLW-amide neuropeptides adding to our knowledge of larval settlement for coral reef invertebrates.

## Methods

### Study sites and species

The common GBR sponges' *R. odorabile* and *C. matthewsi* were used in this study [29]. Substantial information central to their fundamental biology and ecology define them as excellent model species to explore the process of larval recruitment in coral reef sponges [6,14,30–32]. Both species have separate sexes, females brooding parenchymellae larvae with annual larval releases occurring over 4–5 weeks during the Austral summer [6,14].

Ten female *C. matthewsi* were collected from the reef slope of Pioneer bay, Orpheus Island (18°35.61S, 146°29.05E) and transported to facilities at Orpheus Island Research Station (OIRS) where they were maintained in flow through aquaria during December 2010. Twelve female *R. odorabile* were collected from Rib Reef (18°29.51S, 146°52.70E) and transported to aquaria facilities at the Australian Institute of Marine Science (AIMS) in January 2011. Maintaining sponges in flow-through aquaria at OIRS and AIMS allowed controlled collection of larvae over several hours during their morning (*C. matthewsi*) and afternoon (*R. odorabile*) releases. Both species release larvae over several hours each day [6,14].

Larvae were collected using larval traps, following Whalan et al. [6]. Briefly, mesh nets were placed over sponges, each trap housing a central collection jar that floated apically over the sponges. Larvae are positively phototactic at release with larvae congregating at the top of the jar, until collection. Larvae were collected over 2–4 hours, and pooled for use in experimental assays.

### Settlement assays

For all settlement assays, six well polystyrene cell culture plates were used (IWAKI). Treatments were randomised among wells of

the plates and ten larvae were introduced into each treatment (n = 6 wells) by gentle pipetting. The final volume in each well was 10 ml, comprising the treatment concentration with the balance comprising 0.2 µm filtered sea water (FSW). Plates were maintained in shallow dishes with flow through sea water, acting as a water bath to maintain a consistent ambient temperature (≈28°C). Settlement was recorded at 2, 4, 6, 12, 24, 30 and 42 h for *R. odorabile* coinciding with the completion of larval settlement. The same time periods were also used for *C. matthewsi*, with the addition of 48 and 57 h to accommodate the completion of larval settlement.

The use of the term “settlement” can be ambiguous. Following Hadfield [15], settlement involves the transition from a planktonic to benthic life mode accompanied by processes facilitating attachment before metamorphosis; metamorphosis describes developmental changes where distinct and permanent morphological changes are undertaken to form a juvenile. Hereafter, terms of settlement and metamorphosis are based on Hadfield's [15] definition” and since permanent attachment was always observed during metamorphosis in these larvae we use the term “settlement” to encompass both processes.

### Effect of CCA

Samples of CCA (*Porolithon onkodes*) were collected from Bramble Reef (18°24.764S, 146°42.868E) and transported in flowing seawater to AIMS where they were maintained in flow through aquaria pending experimentation. This species was chosen because it is common to shallow reef habitats on the GBR and has been implicated in the settlement of larvae from several species of coral [21]. Small pieces (5×5 mm) of live CCA were used in assays. CCA was brushed lightly to remove any debris before being used in assays. To control for the carbonate substrate that CCA was attached to, 5×5 mm chips of sterile coral rubble were also tested.

To assess the effect of CCA, without the bias of attached coral rubble, *P.onkodes* was removed from the coral rubble substrate it grows on and methanol extracts of CCA were prepared. While our aim was to reduce the interference of ancillary cues associated with CCA (e.g. attached coral rubble) epiphytic material on the surface of CCA could be potentially included in the extraction process and this was an unavoidable artefact. Extracts were prepared by grinding 4 g wet mass of CCA in 10 volumes of methanol (HPLC grade). The slurry was allowed to sit for 24 h at 4°C then vacuum filtered through a GFF filter (Whatman). The methanol was evaporated to dryness under a stream of N<sub>2</sub> then suspended with sonication in 2 ml MQ-water. This extract was applied to a 500 mg C18 SPE cartridge (Waters) and eluted with an additional 10 ml MQ-water under vacuum. This water wash was discarded and the active fraction eluted with 15 ml 4:1 methanol: MQ-water (v/v). This active fraction was freeze dried and resuspended in 8 ml HPLC grade ethanol (a final extract concentration of 500 mg CCA ml<sup>-1</sup>) and stored frozen.

To test a concentration response of CCA extracts on larval settlement, extract volumes equivalent to 0.1, 0.3, 1 and 3 µl (extract) ml<sup>-1</sup> (sea water), equivalent to CCA surface areas of 0.2, 0.6, 2 and 6 mm<sup>2</sup> respectively, were used for assays. These volumes were added to empty wells and allowed to evaporate completely to dryness before seawater and larvae were added. Preliminary tests with higher extract concentrations (10 µl ml<sup>-1</sup>) resulted in high % mortality of larvae for both sponge species while no mortality was recorded for larvae at 3 µl ml<sup>-1</sup>. Controls included a treatment of 0.2 µm FSW and an ethanol control equivalent to the highest extraction concentration.

## Effect of GLW-amide neuropeptides

GLW-amide neuropeptides are linked to pathways that induce metamorphosis in larvae of several coral species [26,27]. To test the effect of this cue on settlement of *C. matthewsi* and *R. odorabile*, a range of concentrations of GLW-amide neuropeptides were used. GLW-amide (sequence EPLPIGLWa) was purchased from Sigma Genosys and made up to a concentration of 1 mM in 0.2 µM filtered sea water (FSW). Six concentrations were tested in assays corresponding to 0.1, 0.3, 1, 3, 10 and 30 µM, in addition to a control of 0.2 µM FSW.

## Statistical treatment

Data are reported as means ( $\pm 1$  standard error). Statistical analyses were performed using SPSS v.17. Two approaches were followed, one analysis being the assessment of treatment effect (live CCA, CCA extracts and GLW-amide) on larval settlement over time. This required a repeated measures analysis of variance (RM ANOVA) that would allow interpretations of whether time to settlement increased or decreased in response to the different treatments.

A second approach assessed settlement at one final time point coinciding with the completion of larval settlement. This represents the settlement (metamorphosis) of larvae into a juvenile sponge and therefore the first stage towards recruitment to a population. Settlement had concluded by 42 h in *R. odorabile* and by 57 h in *C. matthewsi*. For this analysis, a one way analysis of variance (ANOVA) was undertaken on settlement among treatments. Tukey's HSD post hoc test was used to establish where significant differences occurred.

## Results

Larval settlement occurred between 6 and 57 h post-release in *C. matthewsi* and 12 and 42 h post-release in *R. odorabile*.

### CCA -live

*C. matthewsi*: In live CCA treatments larval settlement occurred on the surfaces of Petri dishes with no larvae settling on the CCA. A first analysis to examine whether larvae settled more rapidly in response to live CCA showed that both time and CCA had an effect on larval settlement and this was supported by a significant interaction of time and treatment (Table 1, Fig. 1A). The interactive effect of time and cue is clearly demonstrated from 42–57 h (Fig. 1A). Significant main effects of time and cue were also evident.

A second analysis ignoring cumulative settlement over time and focusing on total settlement at the completion of the experiment, showed a significant effect of live CCA on *C. matthewsi* larval settlement (ANOVA,  $F_{2,15} = 7.34$ ,  $p = 0.01$ ). More specifically, significantly higher settlement occurred in response to CCA ( $70.0 \pm 6.8\%$ ) compared to FSW ( $36.7 \pm 3.3\%$ ) or coral rubble ( $40 \pm 8.9\%$ ), both of which showed consistent settlement (Fig. 1A, Tukey's HSD,  $p < 0.05$ ).

*R. odorabile*: As with larval assays of *C. matthewsi*, *R. odorabile* larvae did not settle on live CCA, but on the surfaces of Petri dishes. A significant interactive effect of time and cue were evident, in addition to significant main effects of time and cue on larval settlement (Table 1, Fig. 1B).

The second analysis for data associated with the single time point at 42 h showed a significant influence of live CCA on larval settlement (ANOVA,  $F_{2,12} = 7.13$ ,  $p = 0.01$ ). Larval settlement was higher in live CCA treatments ( $30 \pm 2.9\%$ ) than FSW controls ( $16.0 \pm 2.4\%$ ) or treatments with coral rubble ( $14 \pm 4\%$ ) (Fig. 1B,

**Table 1.** Repeated measure ANOVA summary statistics of larval settlement in response to cues associated with the live crustose coralline algae, *Porolithon onkodes*(cue), over time.

| Species             | Variability      | Source            | df    | MS     | F     | p    |
|---------------------|------------------|-------------------|-------|--------|-------|------|
| <i>C. matthewsi</i> | within subjects  | Time              | 2.37  | 216.38 | 35.65 | 0.00 |
|                     |                  | time $\times$ cue | 4.75  | 17.07  | 2.81  | 0.03 |
|                     |                  | Residual          | 35.52 | 6.07   |       |      |
|                     | between-subjects | cue               | 2.00  | 29.75  | 3.38  | 0.06 |
|                     |                  | Residual          | 15.00 | 8.79   |       |      |
|                     |                  |                   |       |        |       |      |
| <i>R. odorabile</i> | within-subjects  | Time              | 2.40  | 19.37  | 39.82 | 0.00 |
|                     |                  | time $\times$ cue | 4.80  | 1.45   | 2.99  | 0.03 |
|                     |                  | Residual          | 28.78 | 0.49   |       |      |
|                     | between-subjects | cue               | 2.00  | 2.98   | 5.26  | 0.02 |
|                     |                  | Residual          | 12.00 | 0.57   |       |      |
|                     |                  |                   |       |        |       |      |

F values and significance are based on the Greenhouse-Geisser correction. doi:10.1371/journal.pone.0030386.t001

Tukey's HSD,  $p < 0.05$ ). Larvae exhibited similar settlement success in both FSW and rubble treatments.

### CCA - extracts

*C. matthewsi*: Analysis to determine whether larvae settled more rapidly in response to CCA extracts showed a significant interaction of time and cue, in addition to significant main effects of both factors (Table 2). For figure clarity, only data from one of the highest settlement responses (the 3 µl ml<sup>-1</sup> treatment) is shown, which clearly demonstrates the trend of time  $\times$  treatment, particularly over the period 12–57 h (Fig. 2A). Data analysed at the end time point of 57 h showed a significant effect of CCA extract concentration on larval settlement (Fig. 2 A–B, ANOVA,  $F_{5,30} = 6.70$ ,  $p = 0.00$ ). Moreover, settlement at concentrations of 3 µl ml<sup>-1</sup> was significantly higher than lower concentrations or FSW (Fig. 2B, Tukey's HSD,  $p < 0.05$ ).

*R. odorabile*: Analysis of time to settlement in response to CCA extract revealed that an interaction of both time and cue contributed to settlement (Table 2). Both main effects were also significant. Data from one of the highest settlement responses (3 µl ml<sup>-1</sup>) demonstrates the trend of time  $\times$  treatment, particularly from 24–42 h (Fig. 2A). The second analysis, for data associated with the end point of the experiment (42 h), showed a significant effect of CCA extract concentration on larval settlement (Fig. 2 A–B, ANOVA,  $F_{5,24} = 8.58$ ,  $p = 0.00$ ). Specifically, settlement for concentrations of 1 µl ml<sup>-1</sup> and 3 µl ml<sup>-1</sup> was  $42 \pm 3.3\%$  and  $44 \pm 5.1\%$  respectively, which was significantly higher than settlement associated with CCA extract concentrations of 0.1 µl ml<sup>-1</sup> at  $8.0 \pm 3.9\%$  or FSW at  $16.0 \pm 2.4\%$  (Fig. 2B, Tukey's HSD,  $p < 0.05$ ).

### GLW-amide neuropeptides

*C. matthewsi*: Larval settlement profiles were similar to the CCA experiments where larval settlement occurred between 6–57 h (Fig. 3A). There was a significant interaction of time and cue on larval settlement in addition to significant main independent effects of time and cue (Table 3). Again for figure clarity, data from one of the highest settlement responses (30 µM) is presented, which demonstrates the trend of time  $\times$  treatment, particularly over the period 12–57 h. When the final time point (57 h) was analysed separately, there was a significant influence of GLW-amide neuropeptides on settlement (ANOVA,  $F_{6,34} = 8.29$ ,  $p = 0.00$ ).

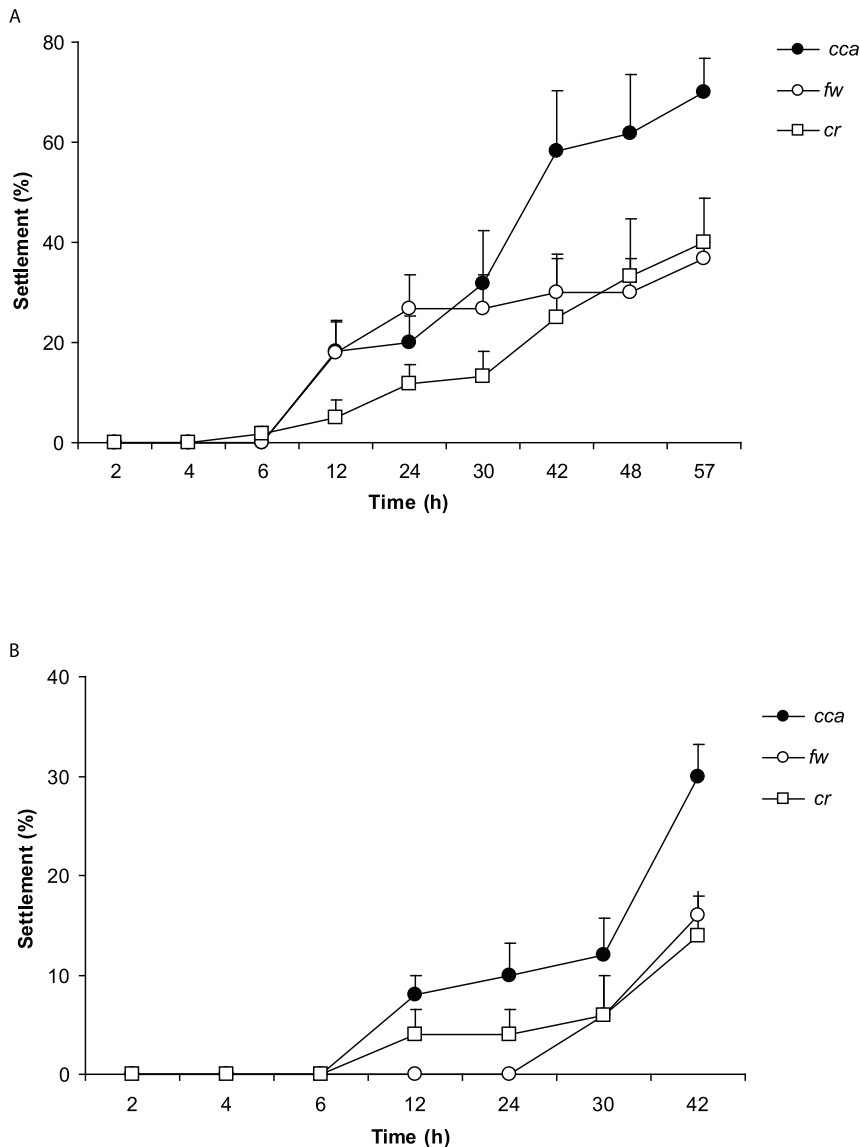

**Figure 1. Larval settlement in response to live CCA.** Mean percentage of (A) *C. matthewsi* and (B) *R. odorabile* larvae settled (+1SE) over time in response to live chips of the crustose coralline algae, *Porolithon onkodes* (CCA), in comparison to 0.2  $\mu\text{m}$  filtered seawater controls (fw) and coral rubble (cr). n = 6 with 10 larvae per replicate. doi:10.1371/journal.pone.0030386.g001

There were clear differences between settlement of mid to high concentrations of GLW-amide neuropeptides (3–30  $\mu\text{M}$ ) and settlement at 0.3  $\mu\text{M}$  and FSW (Fig. 3B, Tukey's HSD,  $p < 0.05$ ). Moreover, there was consistent settlement at concentrations from 1  $\mu\text{M}$  ( $64 \pm 4\%$ ) to 30  $\mu\text{M}$  ( $70.0 \pm 4.5\%$ ), but settlement in these concentrations were significantly higher than FSW ( $36.7 \pm 3.3\%$ ). Settlement at concentrations from 0.1–0.3  $\mu\text{M}$  were at similar levels to FSW.

***R. odorabile*.** Larval settlement in response to GLW-amide neuropeptides commenced between 12 and 24 h for all peptide treatments and from 30 h in the FSW treatment (Fig. 3A). A significant interaction of time to settlement and cue influenced larval settlement (Table 3). Data from one of the highest settlement responses (30  $\mu\text{M}$ ) demonstrates the trend of time  $\times$  treatment, particularly from 24–42 h (Fig. 3A). The single time point analysis at the completion of the experiment (42 h) showed that GLW-amide neuropeptides had a significant effect on larval settlement

(ANOVA,  $F_{6,28} = 7.52$ ,  $p = 0.00$ ). More specifically, the highest settlement occurred in treatments at concentrations of 10  $\mu\text{M}$  and 30  $\mu\text{M}$ , which showed consistent mean settlement of  $42 \pm 5.8\%$  and  $40 \pm 4.5\%$  respectively, although mid concentrations of 1 and 3  $\mu\text{M}$  were also similar at  $24 \pm 4\%$  and  $24.0 \pm 5.8\%$  respectively (Fig. 3B, Tukey's HSD,  $p < 0.05$ ). Notably, settlement at concentrations of 0.1–0.3  $\mu\text{M}$  and FSW were below 20% and significantly less than higher concentrations of 10–30  $\mu\text{M}$ .

## Discussion

Larval settlement in response to cues associated with CCA has not previously been documented in tropical sponges. CCA enhances larval settlement in many species of both hard and soft corals [33,19] so the finding that there is a significant effect on larvae of *R. odorabile* and *C. matthewsi* is further recognition of the role CCA plays as a settlement cue for sessile coral reef

**Table 2.** Repeated measure ANOVA summary statistics of larval settlement in response to cues associated with extracts of the crustose coralline algae, *Porolithon onkodes*(cue), over time.

| Species             | Variability      | Source   | df    | MS     | F     | p    |
|---------------------|------------------|----------|-------|--------|-------|------|
| <i>C. matthewsi</i> | within subjects  | Time     | 3.28  | 280.92 | 97.29 | 0.00 |
|                     |                  | time×cue | 16.41 | 8.79   | 3.05  | 0.00 |
|                     |                  | residual | 98.47 | 2.89   |       |      |
|                     | between-subjects | cue      | 5.00  | 27.28  | 3.45  | 0.01 |
|                     |                  | residual | 30.00 | 7.91   |       |      |
| <i>R. odorabile</i> | within-subjects  | time     | 2.35  | 68.99  | 73.27 | 0.00 |
|                     |                  | time×cue | 11.76 | 4.45   | 4.73  | 0.00 |
|                     |                  | residual | 56.43 | 0.94   |       |      |
|                     | between-subjects | cue      | 5.00  | 3.45   | 4.21  | 0.01 |
|                     |                  | residual | 24.00 | 0.82   |       |      |

F values and significance are based on the Greenhouse- Geisser correction.  
doi:10.1371/journal.pone.0030386.t002

invertebrates. CCA is common to most coral reef environments [34] with functional roles associated with reef accretion [35]. Furthermore, the ubiquitous presence of CCA on coral reefs coupled with its role in larval settlement processes further highlight the importance of these algae as a signal of reef habitat to recruiting larvae [36].

The ability of sessile invertebrate larvae to identify optimal environments to settle is critical given metamorphosis is irreversible. Therefore, settlement to adverse environments can have detrimental impacts on individuals and populations. Detailed information of the cues contributing to settlement in sponges is limited, but habitat related cues associated with biofilms are important for several species of sponges [6,14]. Coral rubble also enhances the transition for initial settlement/attachment to metamorphosis in the sponge *R. odorabile* highlighting the importance of this substrate for post-settlement survival [6]. Settlement of both *C. matthewsi* and *R. odorabile* in response to live CCA is consistent with this proposal, with CCA acting as a signal that larvae have entered a coral reef habitat where post-settlement survival should be maximised.

Cues tested in the present study initiated higher levels of settlement in *C. matthewsi*, which exhibited an approximate twofold

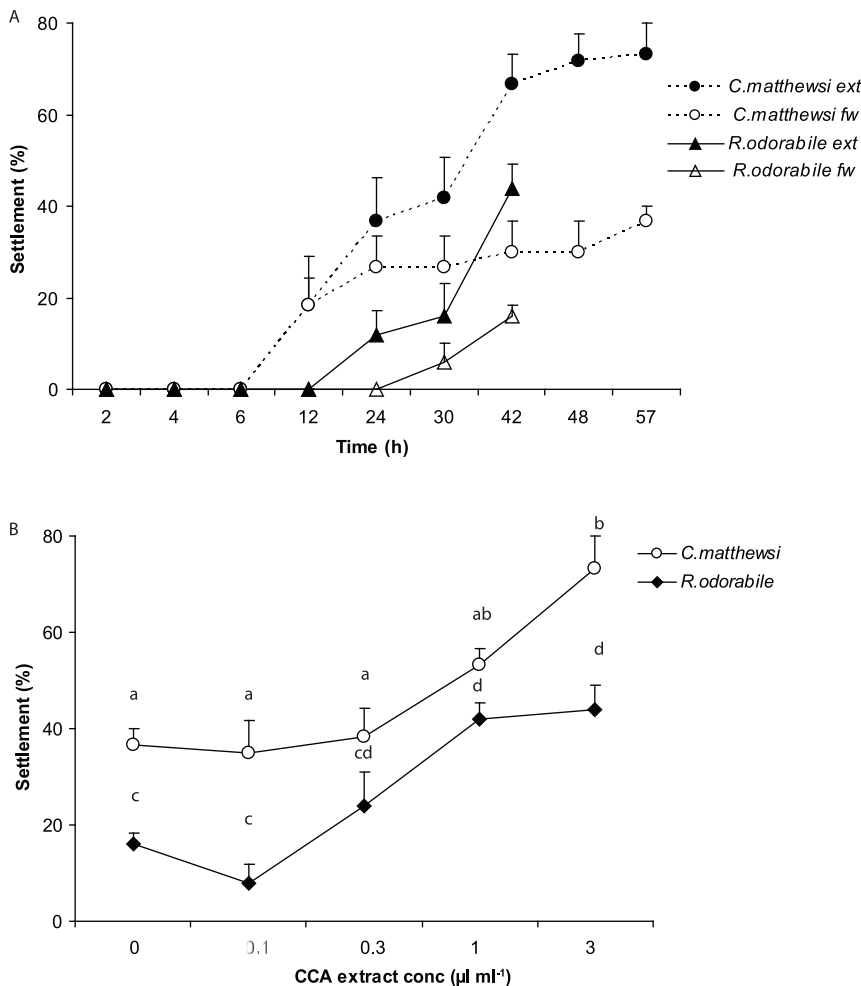

**Figure 2. Larval settlement in response to CCA extracts.** (A) Mean percentage of larvae settled (+1SE) in response to extracts from the CCA, *Porolithon onkodes*, equivalent to a concentration of 3 µl ml<sup>-1</sup>, and 0.2 µm filtered seawater controls (fw). (B) Mean percentage of larvae settled (+1SE) at four concentrations of CCA extract (µl extract ml<sup>-1</sup> seawater) for *C. matthewsi* at 57 h post release and *R. odorabile* at 42 h post release. n = 6 with 10 larvae per replicate.

doi:10.1371/journal.pone.0030386.g002

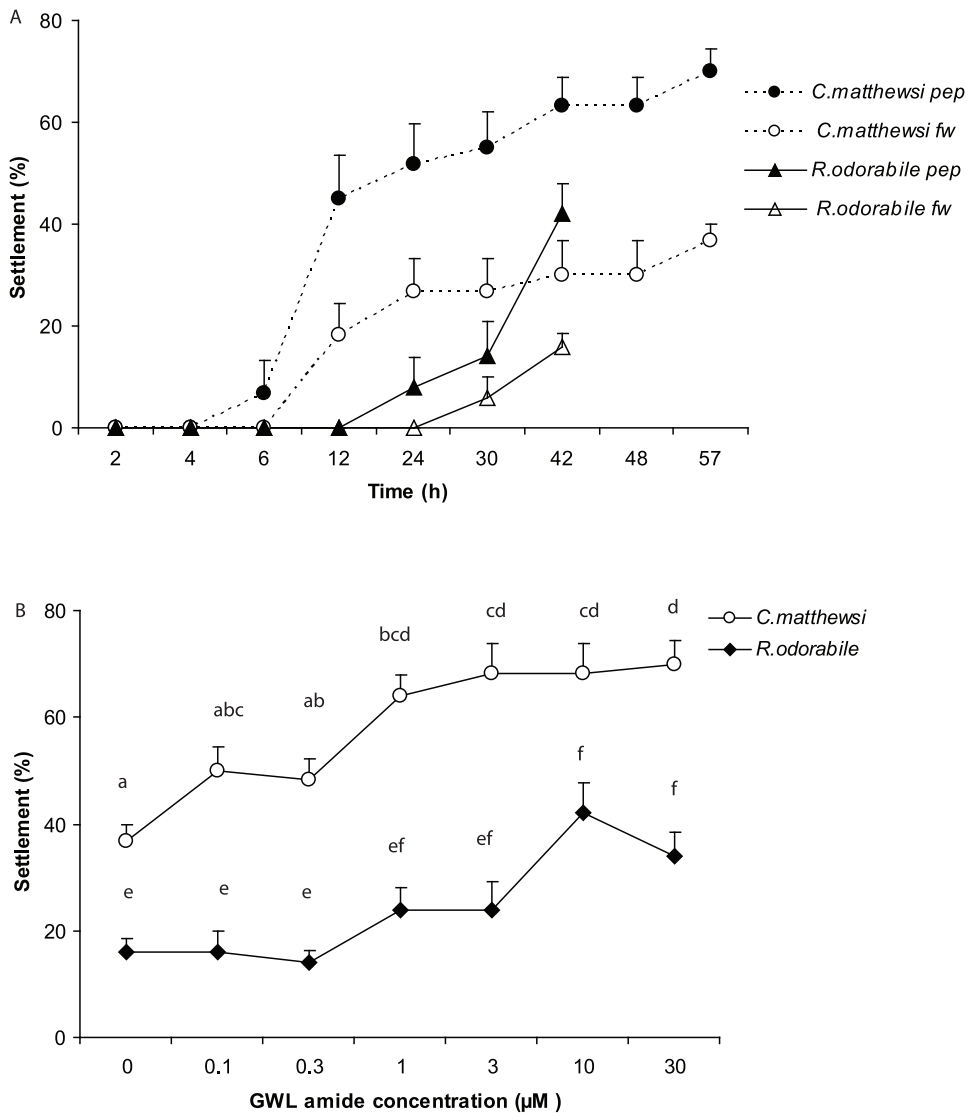

**Figure 3. Larval settlement in response to a cnidarian neuropeptide.** (A) Mean percentage of larvae settled (+1SE) in response to GLW-amide, equivalent to a concentration of 30  $\mu\text{M}$ , and 0.2  $\mu\text{m}$  filtered seawater controls (fw) at six concentrations of GLW-amide for *C. matthewsi* at 57 h post release and *R. odorabile* at 42 h post release. n = 6 with 10 larvae per replicate. doi:10.1371/journal.pone.0030386.g003

higher settlement than *R. odorabile*. The settlement success of sponge larvae upon release is similar to that reported for brooding corals [37]. Settlement success in newly released larvae may be related to their level of development upon release from the parent colony and this may differ between species. Another explanation for differential settlement between sponge species is that *R. odorabile* larvae are more specific in their settlement behaviours. *R. odorabile* larvae also show increased settlement to combinations of biofilm and coral rubble, in comparison to biofilms alone, suggesting a matrix of chemical cues may be required to optimise larval settlement in this species [6]. Importantly, both species showed increased settlement in comparison to FSW controls and coral rubble, supporting the premise that larvae can detect cues that mimic suitable habitats. The settlement to FSW controls without a cue may also provide support to the desperate larval hypothesis, whereby larvae become desperate to settle irrespective of cues [38]. Overall, these results reinforce the idea that there is a complicated matrix of settlement specificity among coral and

sponge species [6,7] and indeed between larvae from broadcast spawning versus brooding species which is exemplified in some coral species [7,19].

Although recent data documenting sponge larval settlement in coral reefs has highlighted the importance of specific cues for habitat recognition and to optimise settlement (i.e. biofilms and coral rubble) it is focused on just a few studies [6,11,14]. The precise compounds that *C. matthewsi* and *R. odorabile* are responding to in CCA was not undertaken in this study, but coral larvae respond to a sulphated glycosaminoglycan [2] and to the bromotyrosine derivative 11-deoxyfistularin-3 [39]. Bacteria associated with CCA may also be a source of compounds like tetrabromopyrrole that induce metamorphosis in corals [40].

Although laboratory studies do not represent field conditions, they are highly suited to isolate the influence of a single factor on metamorphosis and to examine dose-response relationships. The enhanced settlement in response to CCA observed in laboratory studies here indicates sponge larvae possess chemosensory

**Table 3.** Repeated measure ANOVA summary statistics of larval settlement in response to cues associated with the cnidarian neuropeptide, GLW-amide (cue), over time.

| Species             | Variability      | Source   | df     | MS     | F      | p    |
|---------------------|------------------|----------|--------|--------|--------|------|
| <i>C. matthewsi</i> | within subjects  | time     | 3.00   | 584.43 | 162.45 | 0.00 |
|                     |                  | time×cue | 18.00  | 6.75   | 1.87   | 0.03 |
|                     |                  | residual | 102.00 | 3.60   |        |      |
|                     | between-subjects | cue      | 6.00   | 35.00  | 4.09   | 0.03 |
|                     |                  | residual | 34.00  | 8.55   |        |      |
|                     |                  |          |        |        |        |      |
| <i>R. odorabile</i> | within-subjects  | time     | 2.27   | 80.01  | 72.40  | 0.00 |
|                     |                  | time×cue | 13.60  | 2.86   | 2.59   | 0.01 |
|                     |                  | residual | 63.45  | 1.11   |        |      |
|                     | between-subjects | cue      | 6.00   | 1.49   | 1.88   | 0.12 |
|                     |                  | residual | 28.00  | 0.80   |        |      |
|                     |                  |          |        |        |        |      |

F values and significance are based on the Greenhouse-Geisser correction.  
doi:10.1371/journal.pone.0030386.t003

capabilities that play a role in the selection of microhabitats for recruitment. Chemosensory ability has been demonstrated for several groups of marine invertebrates, particularly for barnacles where sensory antennules are used to select optimal settlement sites [41]. Both *R. odorabile* and *C. matthewsi* exhibited enhanced settlement with increased concentrations of CCA extract as well as reduced settlement and increased mortality at the highest CCA extract concentration ( $10 \mu\text{l extract ml}^{-1}$  seawater). Reduced settlement and mortality have also been observed for coral larvae exposed to similarly elevated concentrations of CCA extracts and may reflect a toxic response caused by increased concentrations of co-extracted compounds in the semi-purified CCA extract [19].

## References

- Morse DE, Hooker N, Morse ANC, Jensen RA (1988) Control of larval metamorphosis and recruitment in sympatric agariciid corals. *J Exp Mar Biol and Ecol* 116: 193–217.
- Morse ANC, Iwao K, Baba M, Shimoike K, Hayashibara T, et al. (1996) An ancient chemosensory mechanism brings new life to coral reefs. *Biol Bull* 191: 149–154.
- Maida MJ, Coll C, Sammarco PW (1994) Shedding new light on Scleractinian coral recruitment. *J Exp Mar Biol Ecol* 180: 189–202.
- Mundy CN, Babcock RC (1998) Role of light intensity and spectral quality in coral settlement: implications for depth-dependent settlement. *J Exp Mar Biol and Ecol* 223: 235–255.
- Harrington L, Fabricius K, De'ath G, Negri A (2004) Recognition and selection of settlement substrata determine post-settlement survival in corals. *Ecology* 85: 3428–3437.
- Whalan S, Ettinger-Epstein P, Battershill C, de Nys R (2008) Larval vertical migration and hierarchical selectivity of settlement in a brooding marine sponge. *Mar Ecol Prog Ser* 368: 145–154.
- Baird AH, Morse ANC (2004) Induction of metamorphosis in larvae of the brooding corals *Acropora palifera* and *Stylophora pistillata*. *Mar Fresh Res* 55: 469–472.
- Maldonado M, Uriz MJ (1998) Microrefuge exploitation by subtidal encrusting sponges: patterns of settlement and post-settlement survival. *Mar Ecol Prog Ser* 174: 141–150.
- Nozawa Y, Tanaka K, Reimer JD (2011) Reconsideration of the surface structure of settlement plates used in coral recruitment studies. *Zool Stud* 50(1): 53–60.
- Raimondi PT, Morse ANC (2000) The consequences of complex behaviour in a coral. *Ecology* 81(11): 3193–3211.
- Ettinger-Epstein P, Whalan S, Battershill C, de Nys R (2008) A hierarchy of settlement cues influences larval behaviour in a coral reef sponge. *Mar Ecol Prog Ser* 365: 103–113.
- Hay ME (2009) Marine chemical ecology: Chemical signals and cues structure marine populations, communities, and ecosystems. *Annu Rev Mar Sci* 1: 193–212.
- Webster NS, Smith LD, Heyward AJ, Watts JEM, Webb RI, et al. (2004) Metamorphosis of a scleractinian coral in response to microbial biofilms. *App Env Micro* 70(2): 1213–1221.
- Abdul Wahab MA, de Nys R, Whalan S (2011) Larval behaviour and settlement cues of a brooding coral reef sponge. *Coral Reefs* 30(2): 451–460.
- Hadfield MG (2011) Biofilms and marine invertebrate larvae: What bacteria produce that larvae use to choose settlement sites. *Annu Rev Mar Sci* 3: 453–70.
- Campbell AH, Meritt DW, Franklin RB, Boone EL, Nicely CT, et al. (2011) Effects of age and composition of field-produced biofilms on oyster larval setting. *Biofouling* 27(3): 255–265.
- Elbourne PD, Clare AS (2010) Ecological relevance of a conspecific, waterborne settlement cue in *Balanus amphitrite* (Cirripedia). *J Exp Mar Biol Ecol* 392: 99–106.
- Mercier A, Hamel JF (2009) Reproductive periodicity and host-specific settlement and growth of a deep-water symbiotic sea anemone. *Can J Zool* 87: 967–980.
- Heyward AJ, Negri AP (1999) Natural inducers for coral larval metamorphosis. *Coral Reefs* 18: 273–279.
- Golbuu Y, Richmond RH (2007) Substratum preferences in planula larvae of two species of scleractinian corals, *Goniastrea retiformis* and *Stylaraea punctata*. *Mar Biol* 152: 639–644.
- Ritson-Williams R, Paul VJ, Arnold SN, Steneck RS (2010) Larval settlement preferences and post-settlement survival of the threatened Caribbean corals *Acropora palmate* and *A. cervicornis*. *Coral Reefs* 29: 71–81.
- Grasso LC, Negri AP, Foret S, Saint R, Hayward DC, et al. (2011) The biology of coral metamorphosis: molecular responses of larvae to inducers of settlement and metamorphosis. *Dev Biol* 353: 411–419.
- Pawlik JR (1992) Chemical ecology of the settlement of benthic marine invertebrates. *Oceanog Mar Biol Annu Rev* 30: 273–335.
- Takahashi T, Muneoka Y, Lohmann J, Lopez de Haro MS, Solleder G, et al. (1997) Systematic isolation of peptide signal molecules regulating development in hydra: LW amide and PW families. *Proc Natl Acad Sci* 94: 1241–1246.

25. Schmich J, Trepel S, Leitz T (1998) The role of GLW amides in metamorphosis of *Hydractinia echinata*. *Dev Genes Evol* 208: 267–273.
26. Iwao K, Fujisawa T, Hatta M (2002) A cnidarian neuropeptide of the GLW amide family induces metamorphosis of reef-building corals in the genus *Acropora*. *Coral Reefs* 21: 127–129.
27. Erwin PM, Szmant AM (2010) Settlement induction of *Acropora palmata* planulae by a GLW-amide neuropeptide. *Coral Reefs* 29: 929–939.
28. Srivastava M, Simakov O, Chapman J, Fahey B, Gauthier MEA, et al. (2010) The *Amphimedon queenslandica* genome and the evolution of animal complexity. *Nature* 466(5): 720–725.
29. Bannister RJ, Brinkman R, Wolff C, Battershill C, de Nys R (2007) The distribution and abundance of dictyoceratid sponges in relation to hydrodynamic features: identifying candidates and environmental conditions for sponge aquaculture. *Mar Freshw Res* 58: 624–633.
30. Whalan S, Battershill C, de Nys R (2007) Variability in reproductive output across a water quality gradient for a tropical marine sponge. *Mar Biol* 153(2): 163–169.
31. Whalan S, Ettinger-Epstein P, de Nys R (2008) The effect of temperature on larval pre-settlement duration and metamorphosis for the sponge, *Rhopaloeides odorabile*. *Coral Reefs* 27(4): 783–786. 33.
32. Whalan S, Battershill C, de Nys R (2007) Sexual reproduction of the brooding sponge *Rhopaloeides odorabile*. *Coral Reefs* 26: 655–663.
33. Lasker HR, Kim K (1996) Larval development and settlement behaviour of the gorgonian coral *Plexaura kuna*. *J Exp Mar Biol Ecol* 207: 161–175.
34. Fabricius K, De'ath G (2001) Environmental factors associated with the spatial distribution of crustose coralline algae on the Great Barrier Reef. *Coral Reefs* 19: 303–309.
35. Nelson WA (2009) Calcified macroalgae – critical to coastal ecosystems and vulnerable to change: a review. *Mar Freshw Res* 60: 787–801.
36. Morse A, Morse DE (1984) Recruitment and metamorphosis of *Haliotis* larvae induced by molecules uniquely available at the surfaces of crustose red algae. *J Exp Mar Biol Ecol* 75: 191–215.
37. Harii SH, Kayanne HK, Takigawa HT, Hayashibara TH, Yamamoto MY (2002) Larval survivorship, competency periods and settlement of two brooding corals, *Heliopora coerulea* and *Pocillopora damicornis*. *Mar Biol* 141: 39–46.
38. Toonen RJ, Pawlik JR (1994) Foundations of gregariousness. *Nature (Lond)* 370: 511–512.
39. Kitamura M, Koyama T, Nakano Y, Uemura D (2007) Characterization of a natural inducer of coral larval metamorphosis. *J Exp Mar Biol Ecol* 340: 96–102.
40. Tebben J, Tapiolas DM, Motti CA, Abrego D, Negri AP, et al. (2011) Induction of larval metamorphosis of the coral *Acropora millepora* by tetrabromopyrrole isolated from a *Pseudoalteromonas* bacterium. *PLoS ONE* 6(4): e19082. doi:10.1371/journal.pone.0019082.
41. Maruzzo D, Conlan S, Aldred N, Clare AS, Hoeg JT (2011) Video observation of surface exploration in cyprids of *Balanus amphitrite*: the movements of antennular sensory setae. *Biofouling* 27(2): 225–239.
